# Supplementary material for: Separation and Identification of Permethylated Glycan Isomers by Reversed Phase NanoLC-NSI-MSn
Source: PubMed Central journal article supplement (PMC8724860; doi:10.1074/mcp.ra120.002266), 2021-01-26
Supplement: mmc1.pdf [file mmc1.pdf]

## Supplemental Material

### Separation and identification of permethylated glycan isomers by reversed phase nanoLC-NSI-MS<sup>n</sup>

Simone Kurz<sup>1,\*</sup>, M. Osman Sheikh<sup>1,\*</sup>, Shan Lu<sup>3</sup>, Lance Wells<sup>1,2,†</sup>, and Michael Tiemeyer<sup>1,2,†</sup>

## Supplement 1 - Reduction of N-glycans

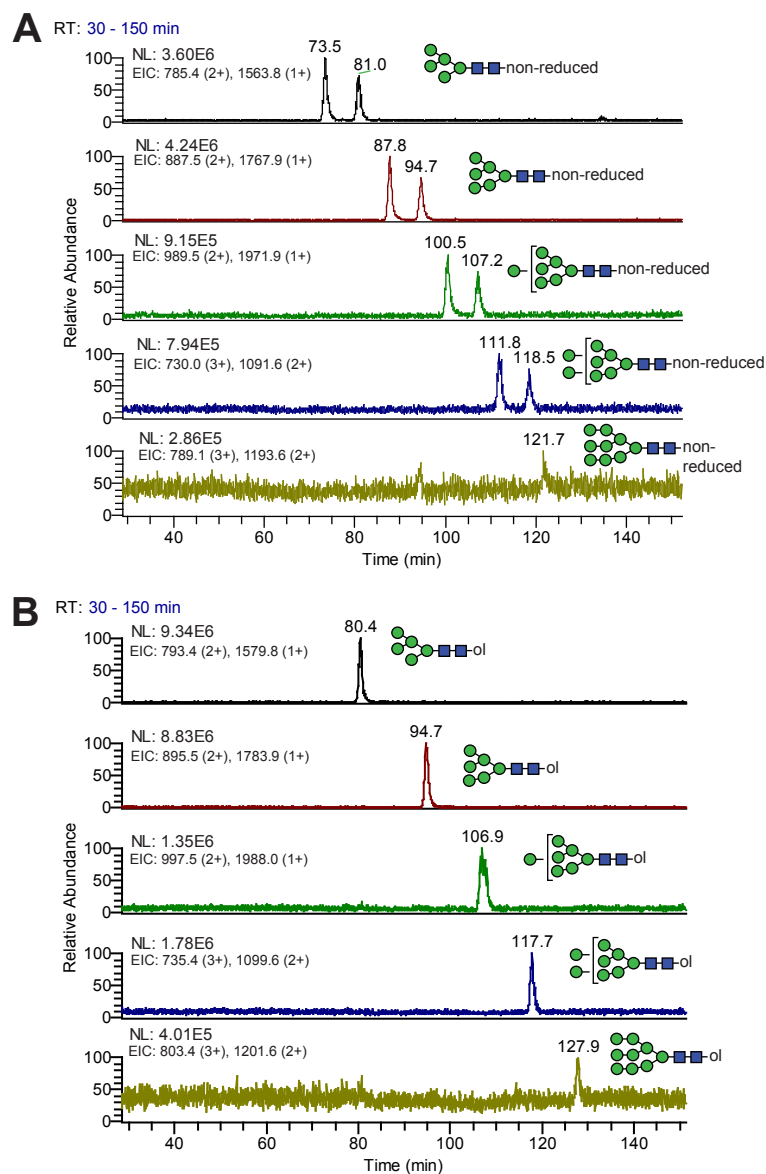

**Supplement 1. Reduction of N-glycans prior to permethylation is recommended to avoid peak-splitting during LC-separation.** PNGase F released N-glycans from RNase B were subjected to PepMap Acclaim C18 LC separation in 1 mM lithium acetate-containing mobile phases and detected using Thermo Velos Pro MS. Extracted ion chromatograms of predicted RNase B permethylated Man5-Man9 structures demonstrate that non-reduced N-glycans tend to peak-split due to the anomeric configuration (**A**), while reduced glycans do not (**B**).

## Supplement 2 - Reproducibility of Standard Performance

### A. Before Sample Queue

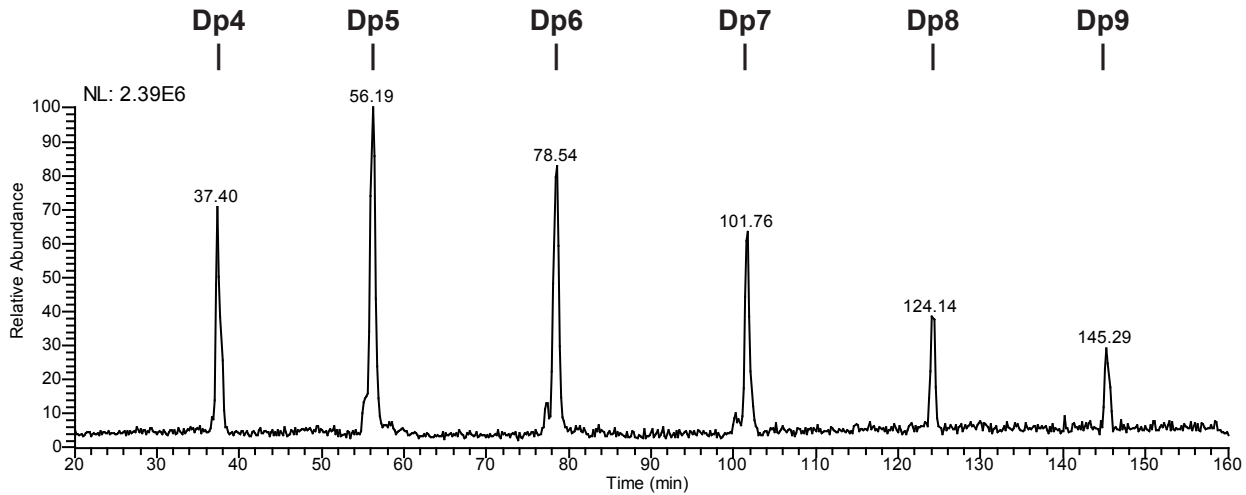

### B. 25 Days Later

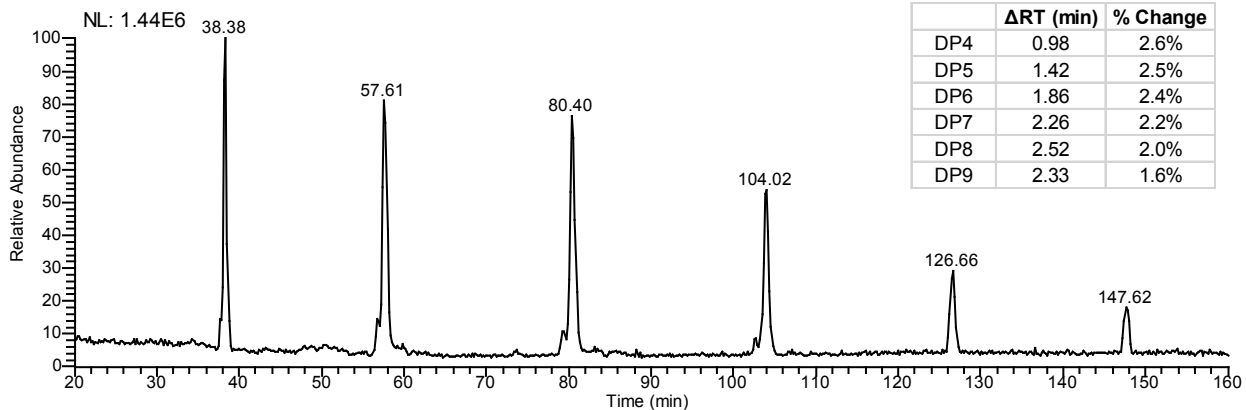

**Supplement 2. Reproducibility of standard performance.** (A) Reduced and  $^{13}\text{C}$ -per-methylated Dextran (isomaltooligosaccharide series, DP4 to 9) was separated using a PepMap Acclaim C18 column in 1 mM lithium acetate-containing mobile phases (45-70% B over 150 mins). Extracted ion chromatogram for each predicted mass is shown (within 10 ppm). (B) Rerun of Dextran after 25 days of continuously running samples.

## Supplement 3 - Limit of Detection

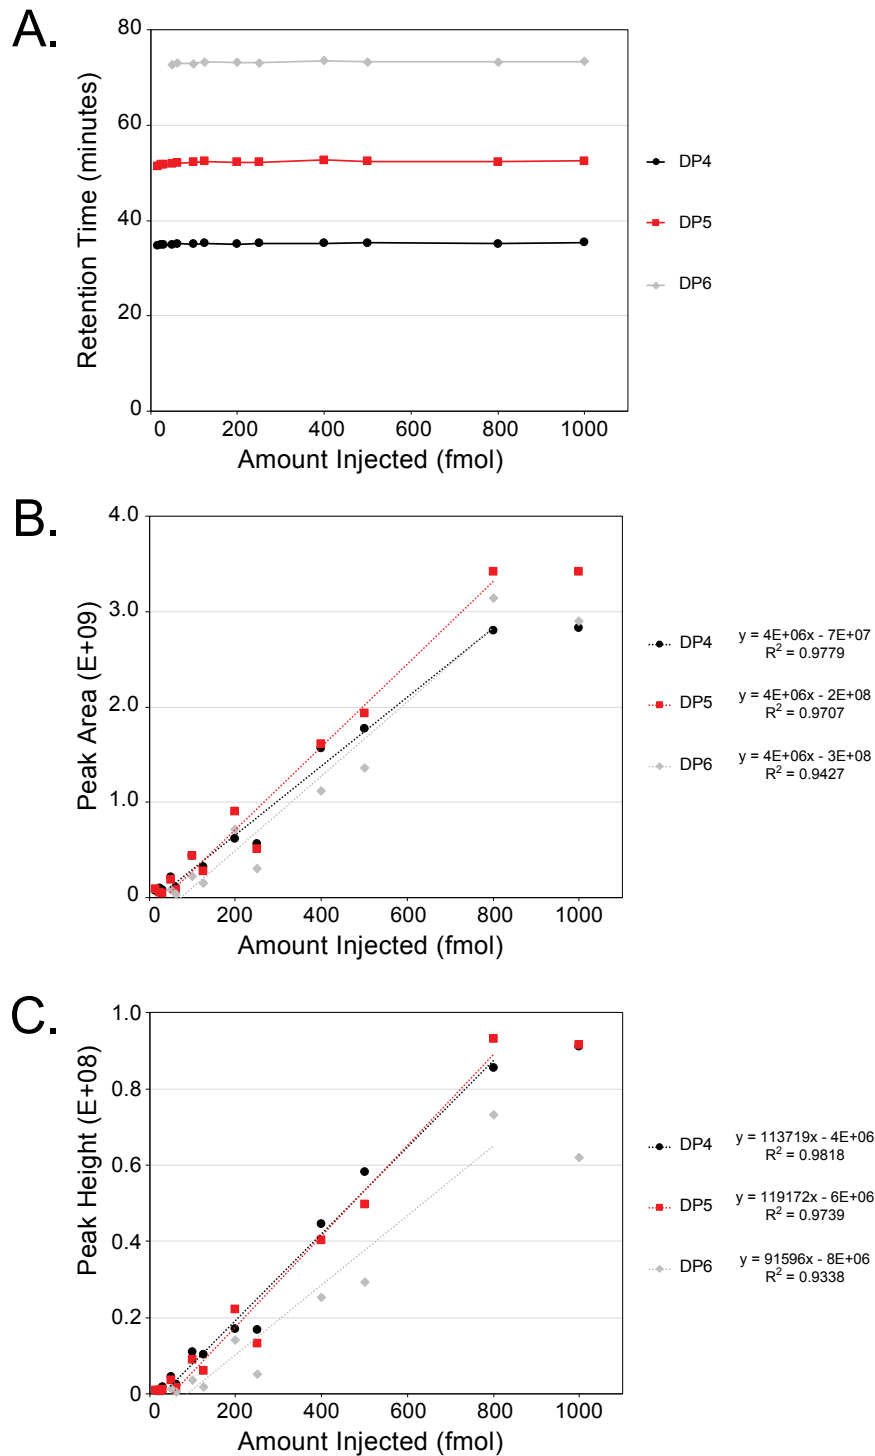

**Supplement 3. Limit of Detection.** Reduced and  $^{13}\text{C}$ -permethylated isomalto analytical standards DP4-6 were analyzed by LC-NSI-MS at different amounts ranging from 15.625 to 1000 femtomoles injected and EICs were evaluated based on (A) Peak apex retention time, (B) Peak Area, and (C) Peak Height. Regression analysis in B and C was performed over the range 50-800 fmol injected.
